# Supplementary material for: Synthesis and Dimerization Behavior of Five Metallophthalocyanines in Different Solvents
Source: Hindawi journal article supplement (doi:10.1155/2014/914916), 2014-01-01
Supplement: f1 [file 914916.f1.doc]

# Synthesis and Dimerization Behavior of Five Metallophthalocyanines in Different Solvents

CHENG Zhenhua, CUI Na, ZHANG Hongxiao, ZHU Lijun, XIA Daohong *

State Key Laboratory of Heavy Oil Processing, College of Chemical Engineering, China University of Petroleum, Qingdao 266580, P. R. China

**1. The synthesis of solid-phase synthesis of metallophthalocyanine (MPcs)：**

In a typical experiment, copper phthalocyanine was prepared as shown in Fig. 1 by the following procedure. Phthalic anhydride (10 g, 67.6 mmol), urea (20.3 g, 338.3mmol, exceeding the theoretical amount), anhydrous cupric chloride (2.3 g, 17.0 mmol) and catalytic amount of ammonium molybdate (0.25 g, 1.2 mmol) were grinded in a porcelain mortar. The well-homogenized reaction mixture was transferred into an evaporating dish and placed in a muffle furnace. Then it was slowly heated to 140 oC (reactant mixture melted) and maintained for 30 min, followed by heated in steps to 240 oC and kept at this temperature for 4-5 h. The purification procedure for this small scale reaction differed from the published method. Upon cooling to room temperature, the product was soaked with 6 mol/L of hydrochloric acid for 12 h. Then the deep blue slurry was heated to 50-60 oC and filtered, the solid product was dried after washed with hot water for 10 times. The residue was dissolved in 98% sulfuric acid again, and filtered with a buchuer funnel. CuPc was precipitated after crushed ice was added into the filtrate, washed with water to neutral, followed by 15 mL alcohol, 15 mL acetone for 3 times separately. Then the the blue powder was obtained after extraction in a Soxhlet extractor with alcohol for 6 h and acetone for 6 h separately. Under vacuum dried for 1 day to give 7.5 g (yield of 77.2%) of the desired pure product as deep blue powder.

The others MPc complexes were all prepared with yield over 75% in the same way with different optimized reaction temperature of FePc (240 oC), CoPc and NiPc (220 oC), and ZnPc (260 oC).

**2. FT-IR analysis**

The room temperature infrared absorption spectra of MPcs (shown in Fig S1) deposited on KBr substrates were recorded in the region 4000-400 cm-1 with a Nicolet 6700 Fourier transform infrared (FT-IR, Thermo Scientific) spectrophotometer. The accuracy of the recorded infrared frequencies was +2.0 cm-1 throughout the 400-4000 cm-1 region. Since metal phthalocyanine is formed based on the metal-free phthalocyanine, thus there are some differences between metal phthalocyanine and free phthalocyanine of infrared spectrum. Firstly, in spectra of metal phthalocyanine, the infrared absorption peak of N-H band disappeared. Secondly, the original non-infrared active bond becomes infrared active chemical bond, because of the molecular symmetry increase after the metal coordinated with phthalocyanine ring, which leads to the new absorption peaks appear in the infrared spectrum.

There are some characteristic absorption peaks of phthalocyanine ring for the five MPcs. The strong absorption peak appeared near 3100 cm-1, which is due to the C-H stretching vibration of the aromatic ring. The C = C and C = N bond conjugated with each other, and they have a relatively similar bond lengths, so the stretching vibration absorption peaks of C = C and C = N appeared at around 1600 cm-1 and 1500 cm-1. There is only a medium intensity absorption peaks in the 800-900 cm-1, and the free phthalocyanine should have two characteristic absorption peaks in this range, so this phenomenon indicates that the coordination reaction of metals with phthalocyanines has occurred. All the infrared spectroscopies further demonstrate the structures of the MPcs synthesized.





Figure S1 FT-IR spectras of MPcs


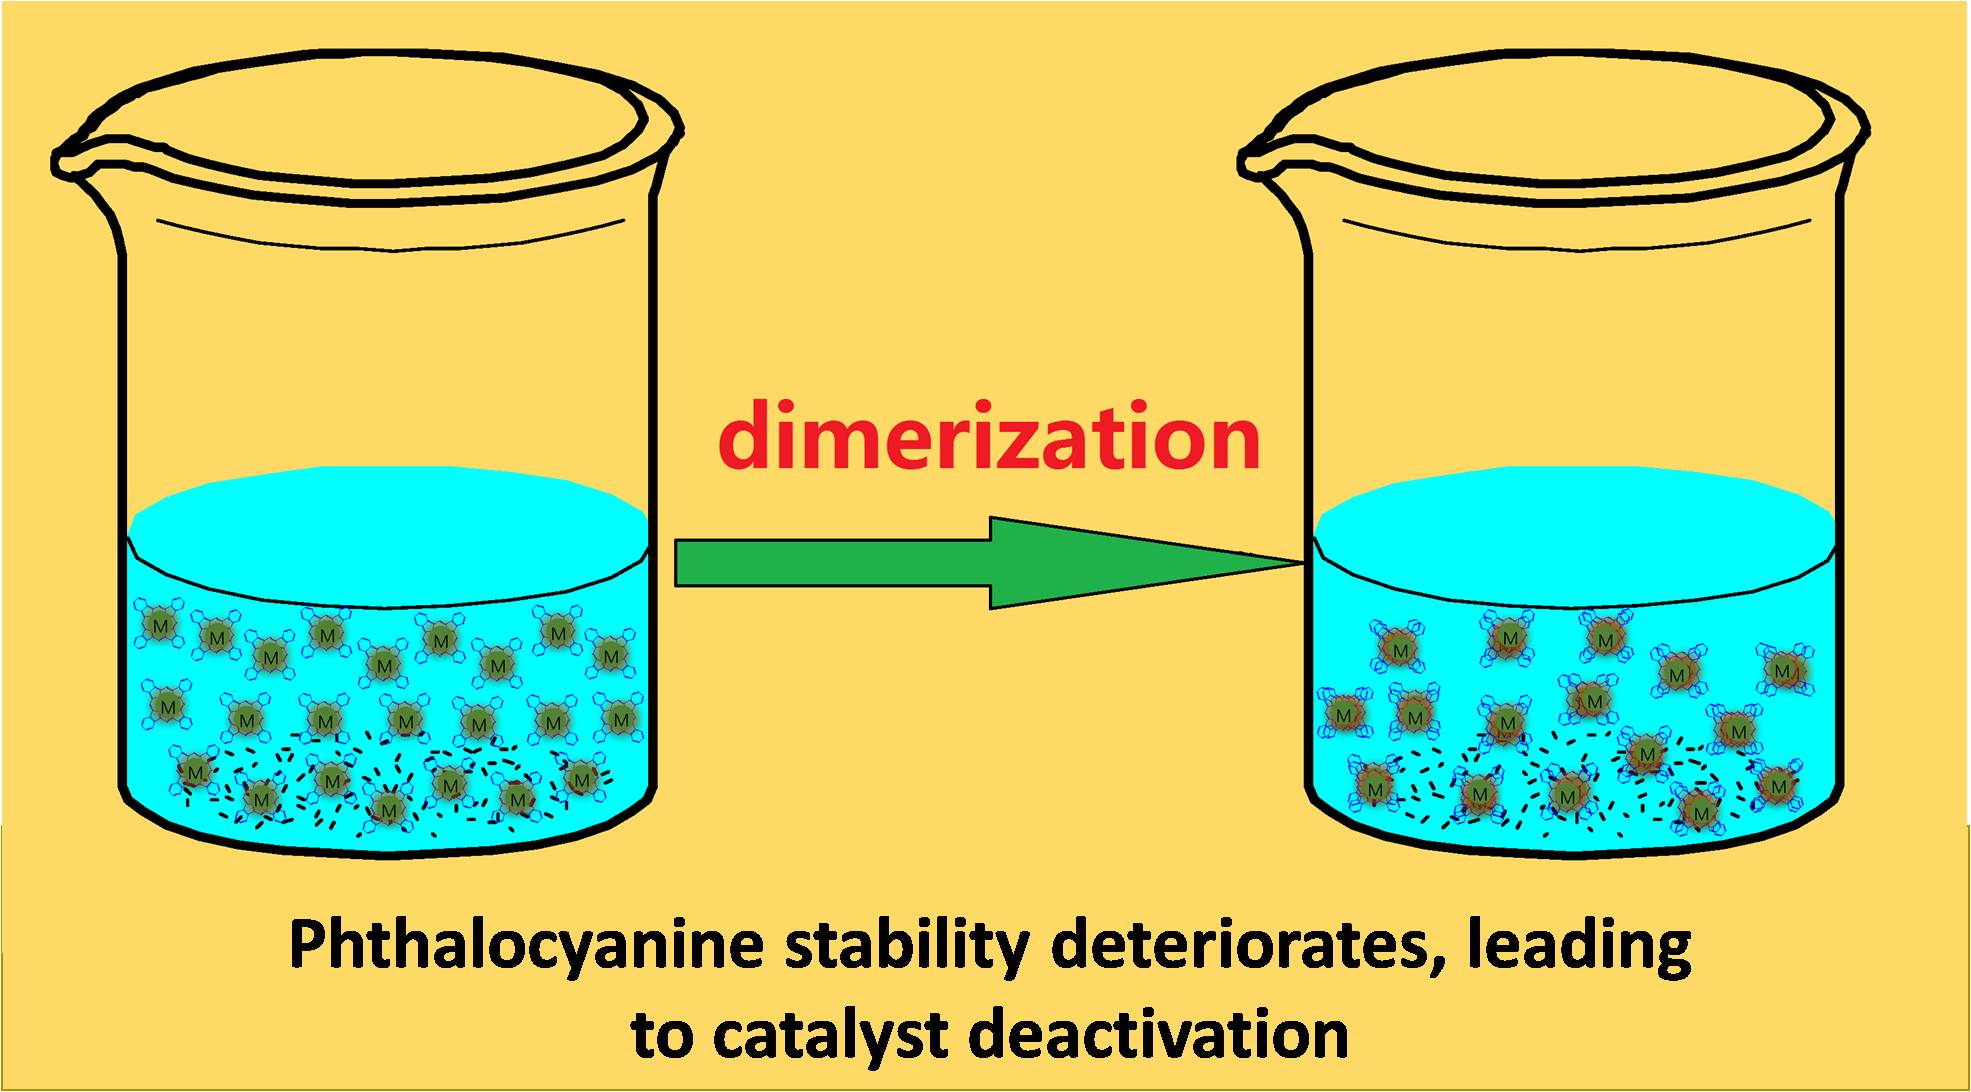


**Grahpic Abstract**
